# Supplementary material
Source: publisher site journal article supplement (https://www.dovepress.com/article/320169)

M

F

659

812

103

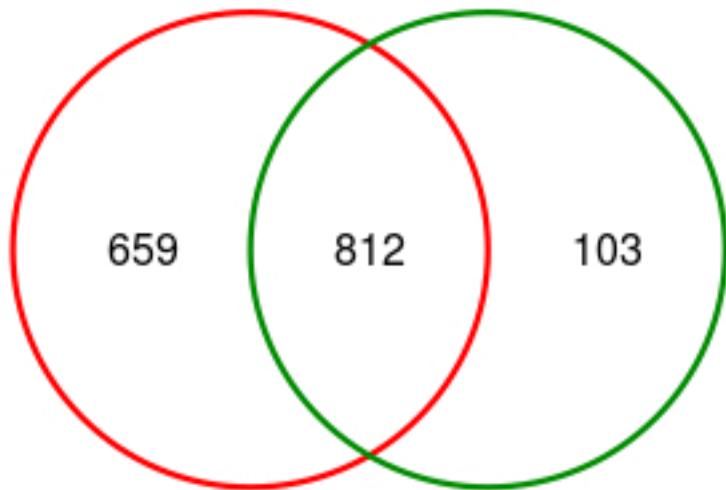

Supplement: Supplementary file 1 [file 09_Aug_2021_supplementary_figure_1.pdf › 09_Aug_2021_supplementary_figure_1.pdf]

**chao1**

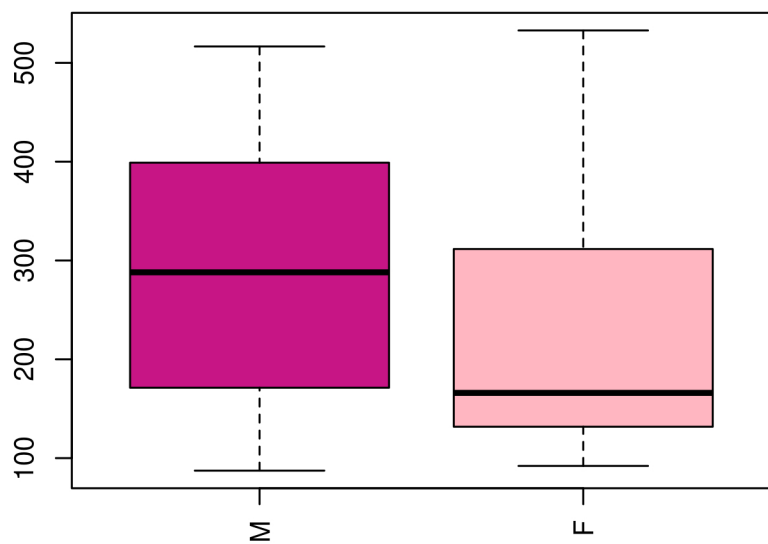

**observed\_species**

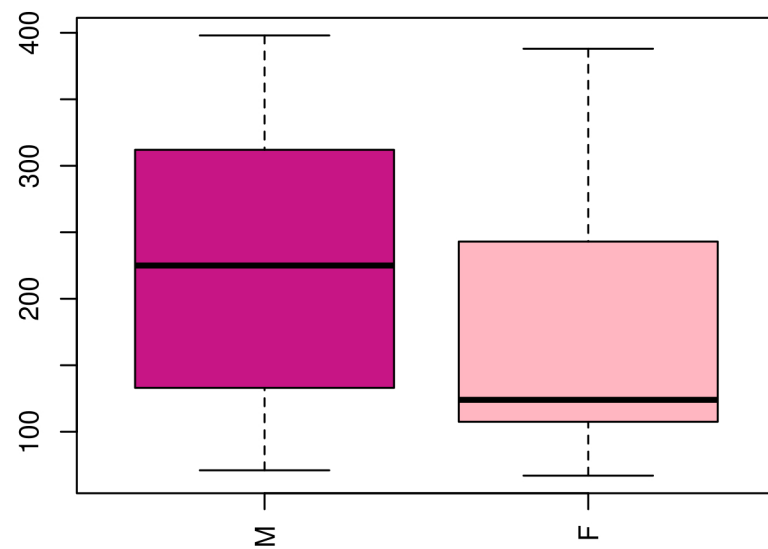

**PD\_whole\_tree**

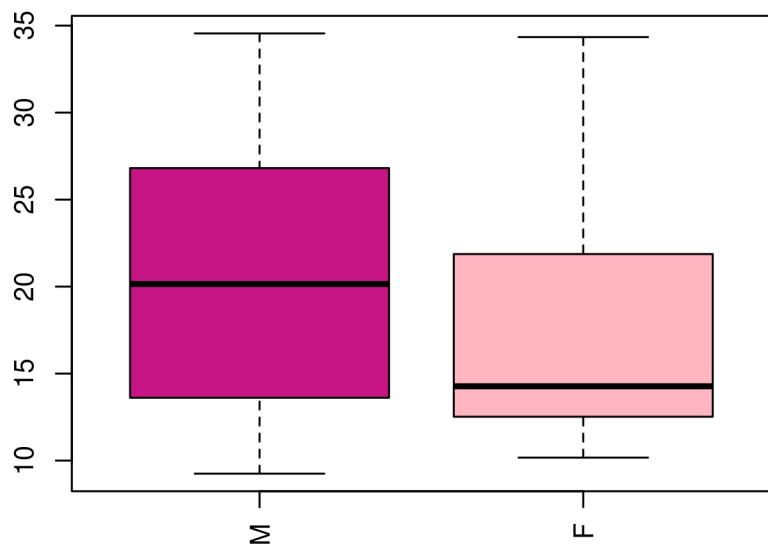

**shannon**

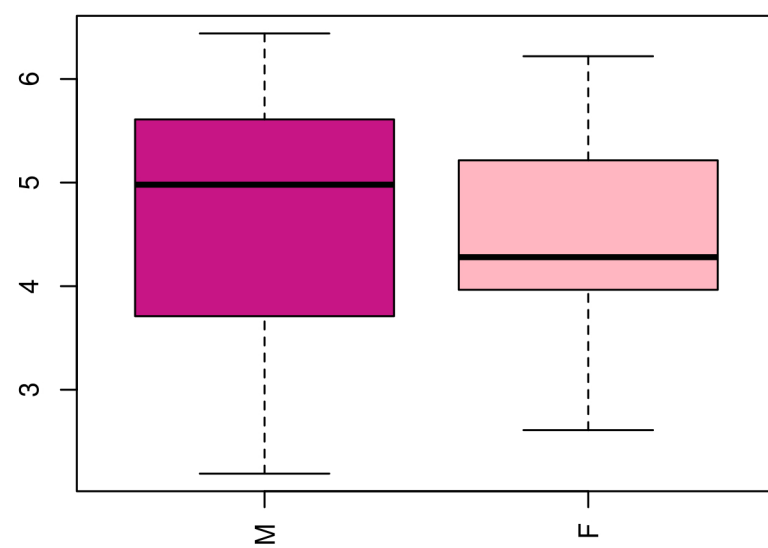

Supplement: Supplementary file 2 [file 09_Aug_2021_supplementary_figure_2.pdf › 09_Aug_2021_supplementary_figure_2.pdf]

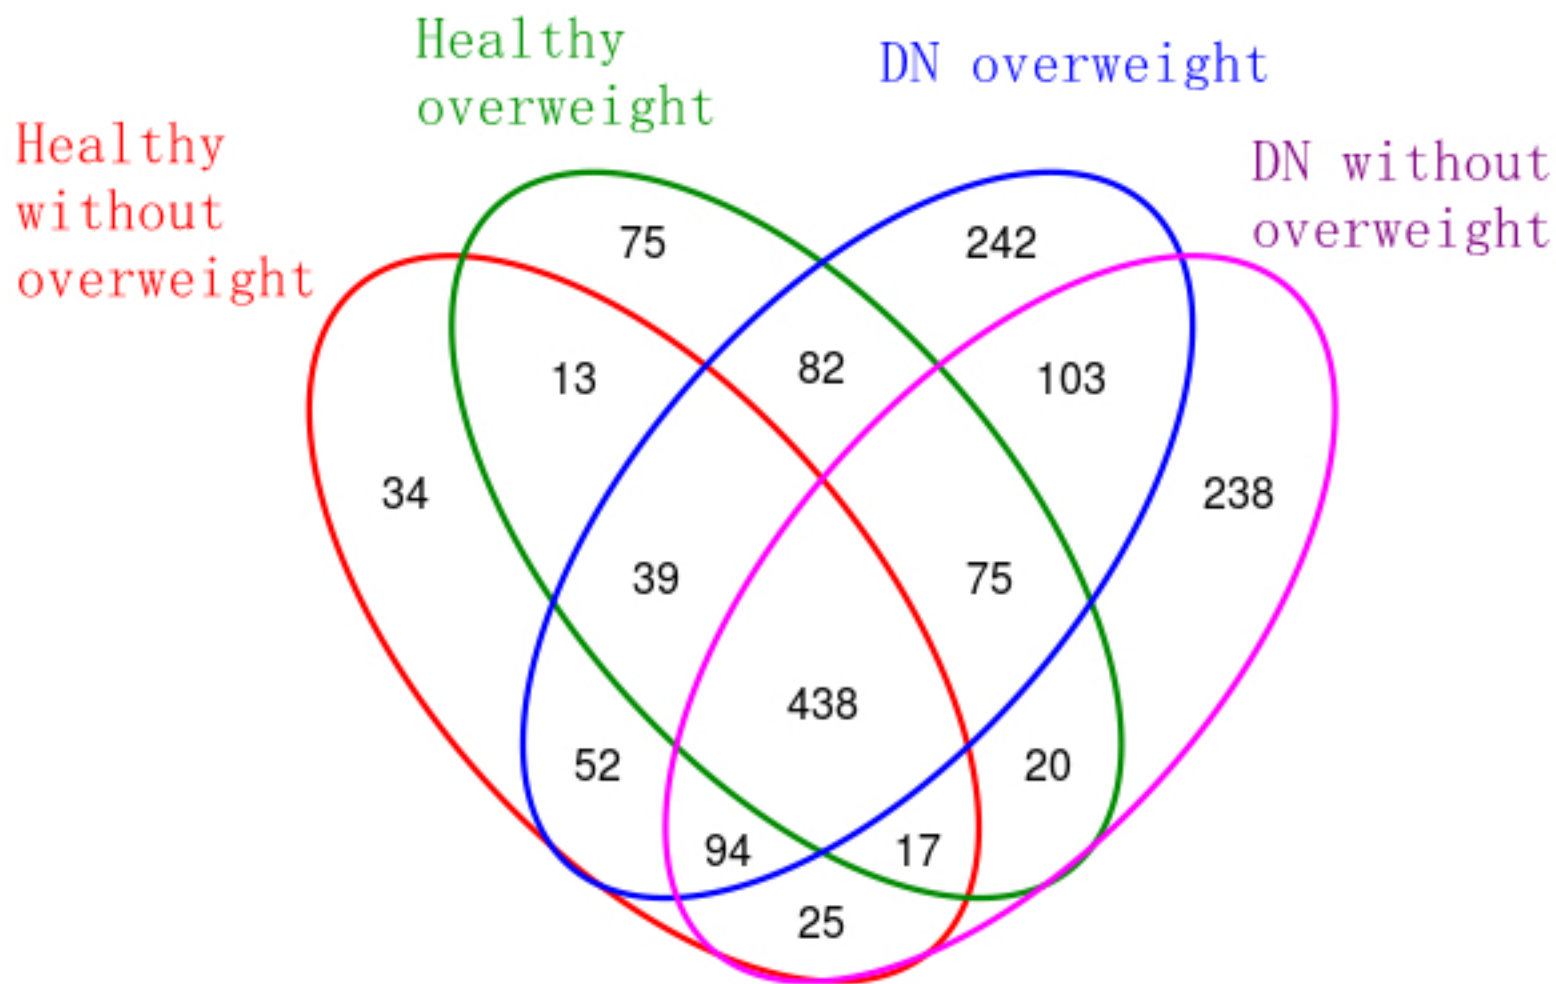

Supplement: Supplementary file 3 [file 09_Aug_2021_supplementary_figure_3.pdf › 09_Aug_2021_supplementary_figure_3.pdf]

chao1

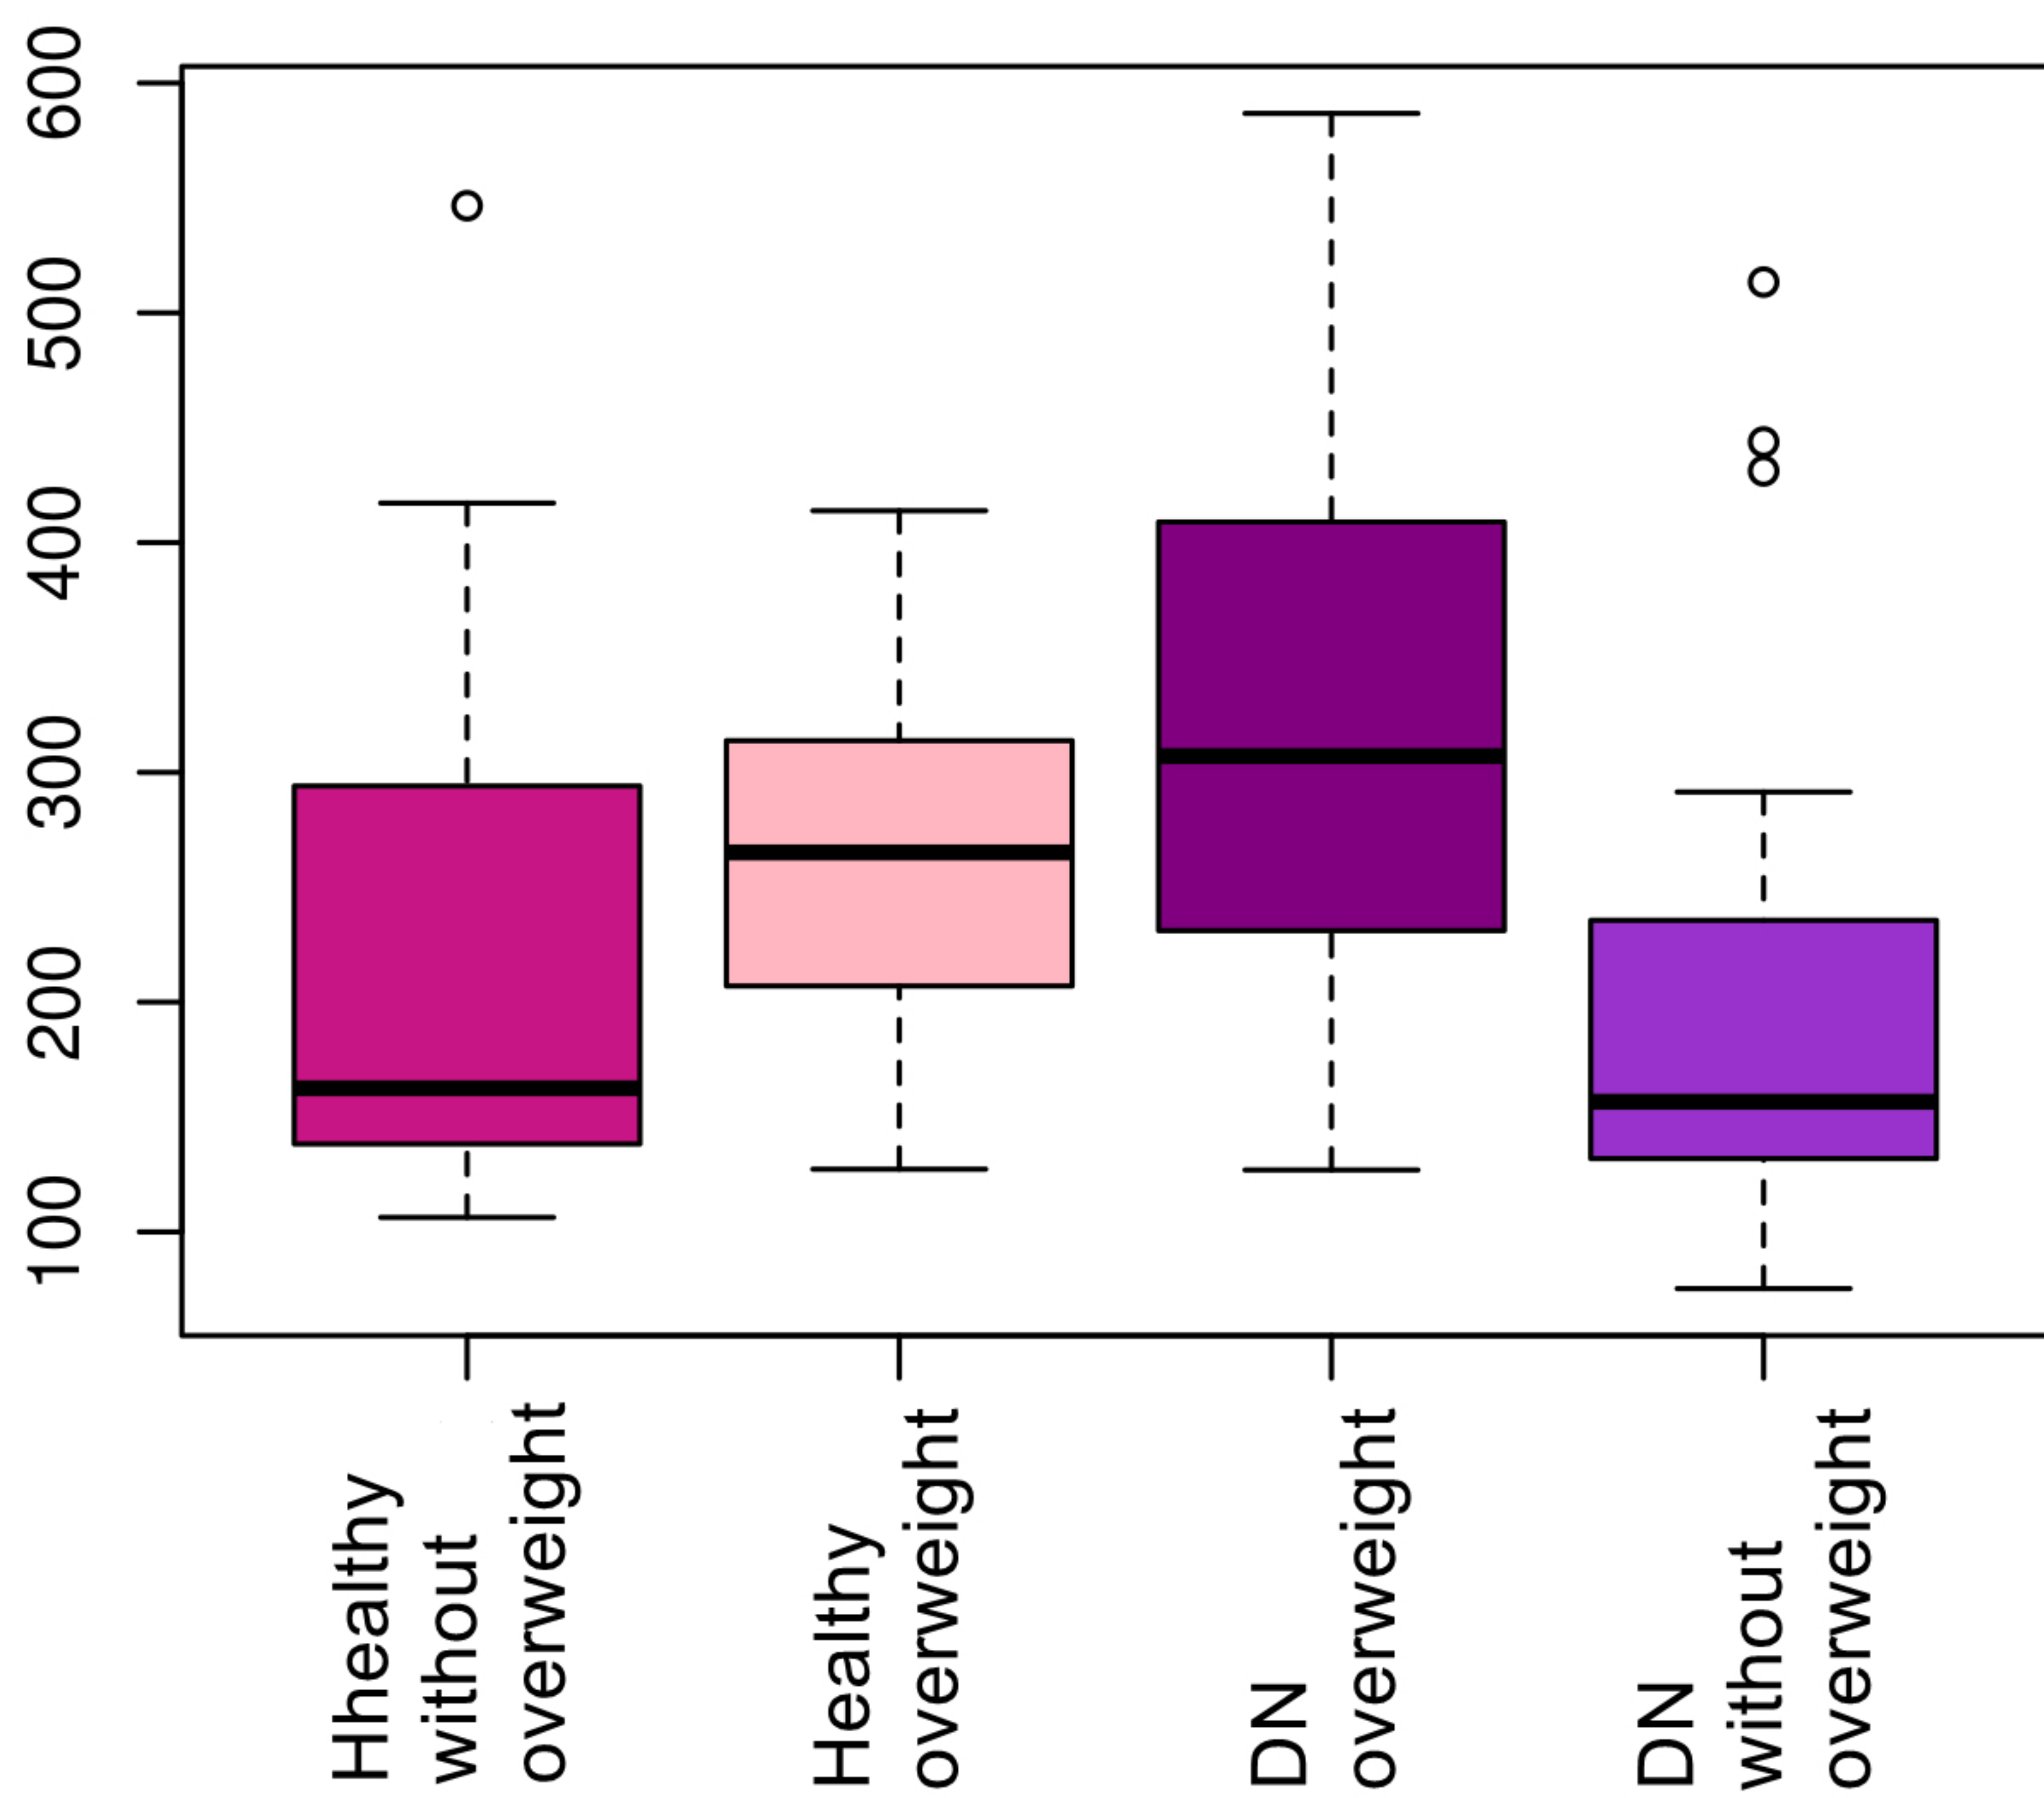

observed\_species

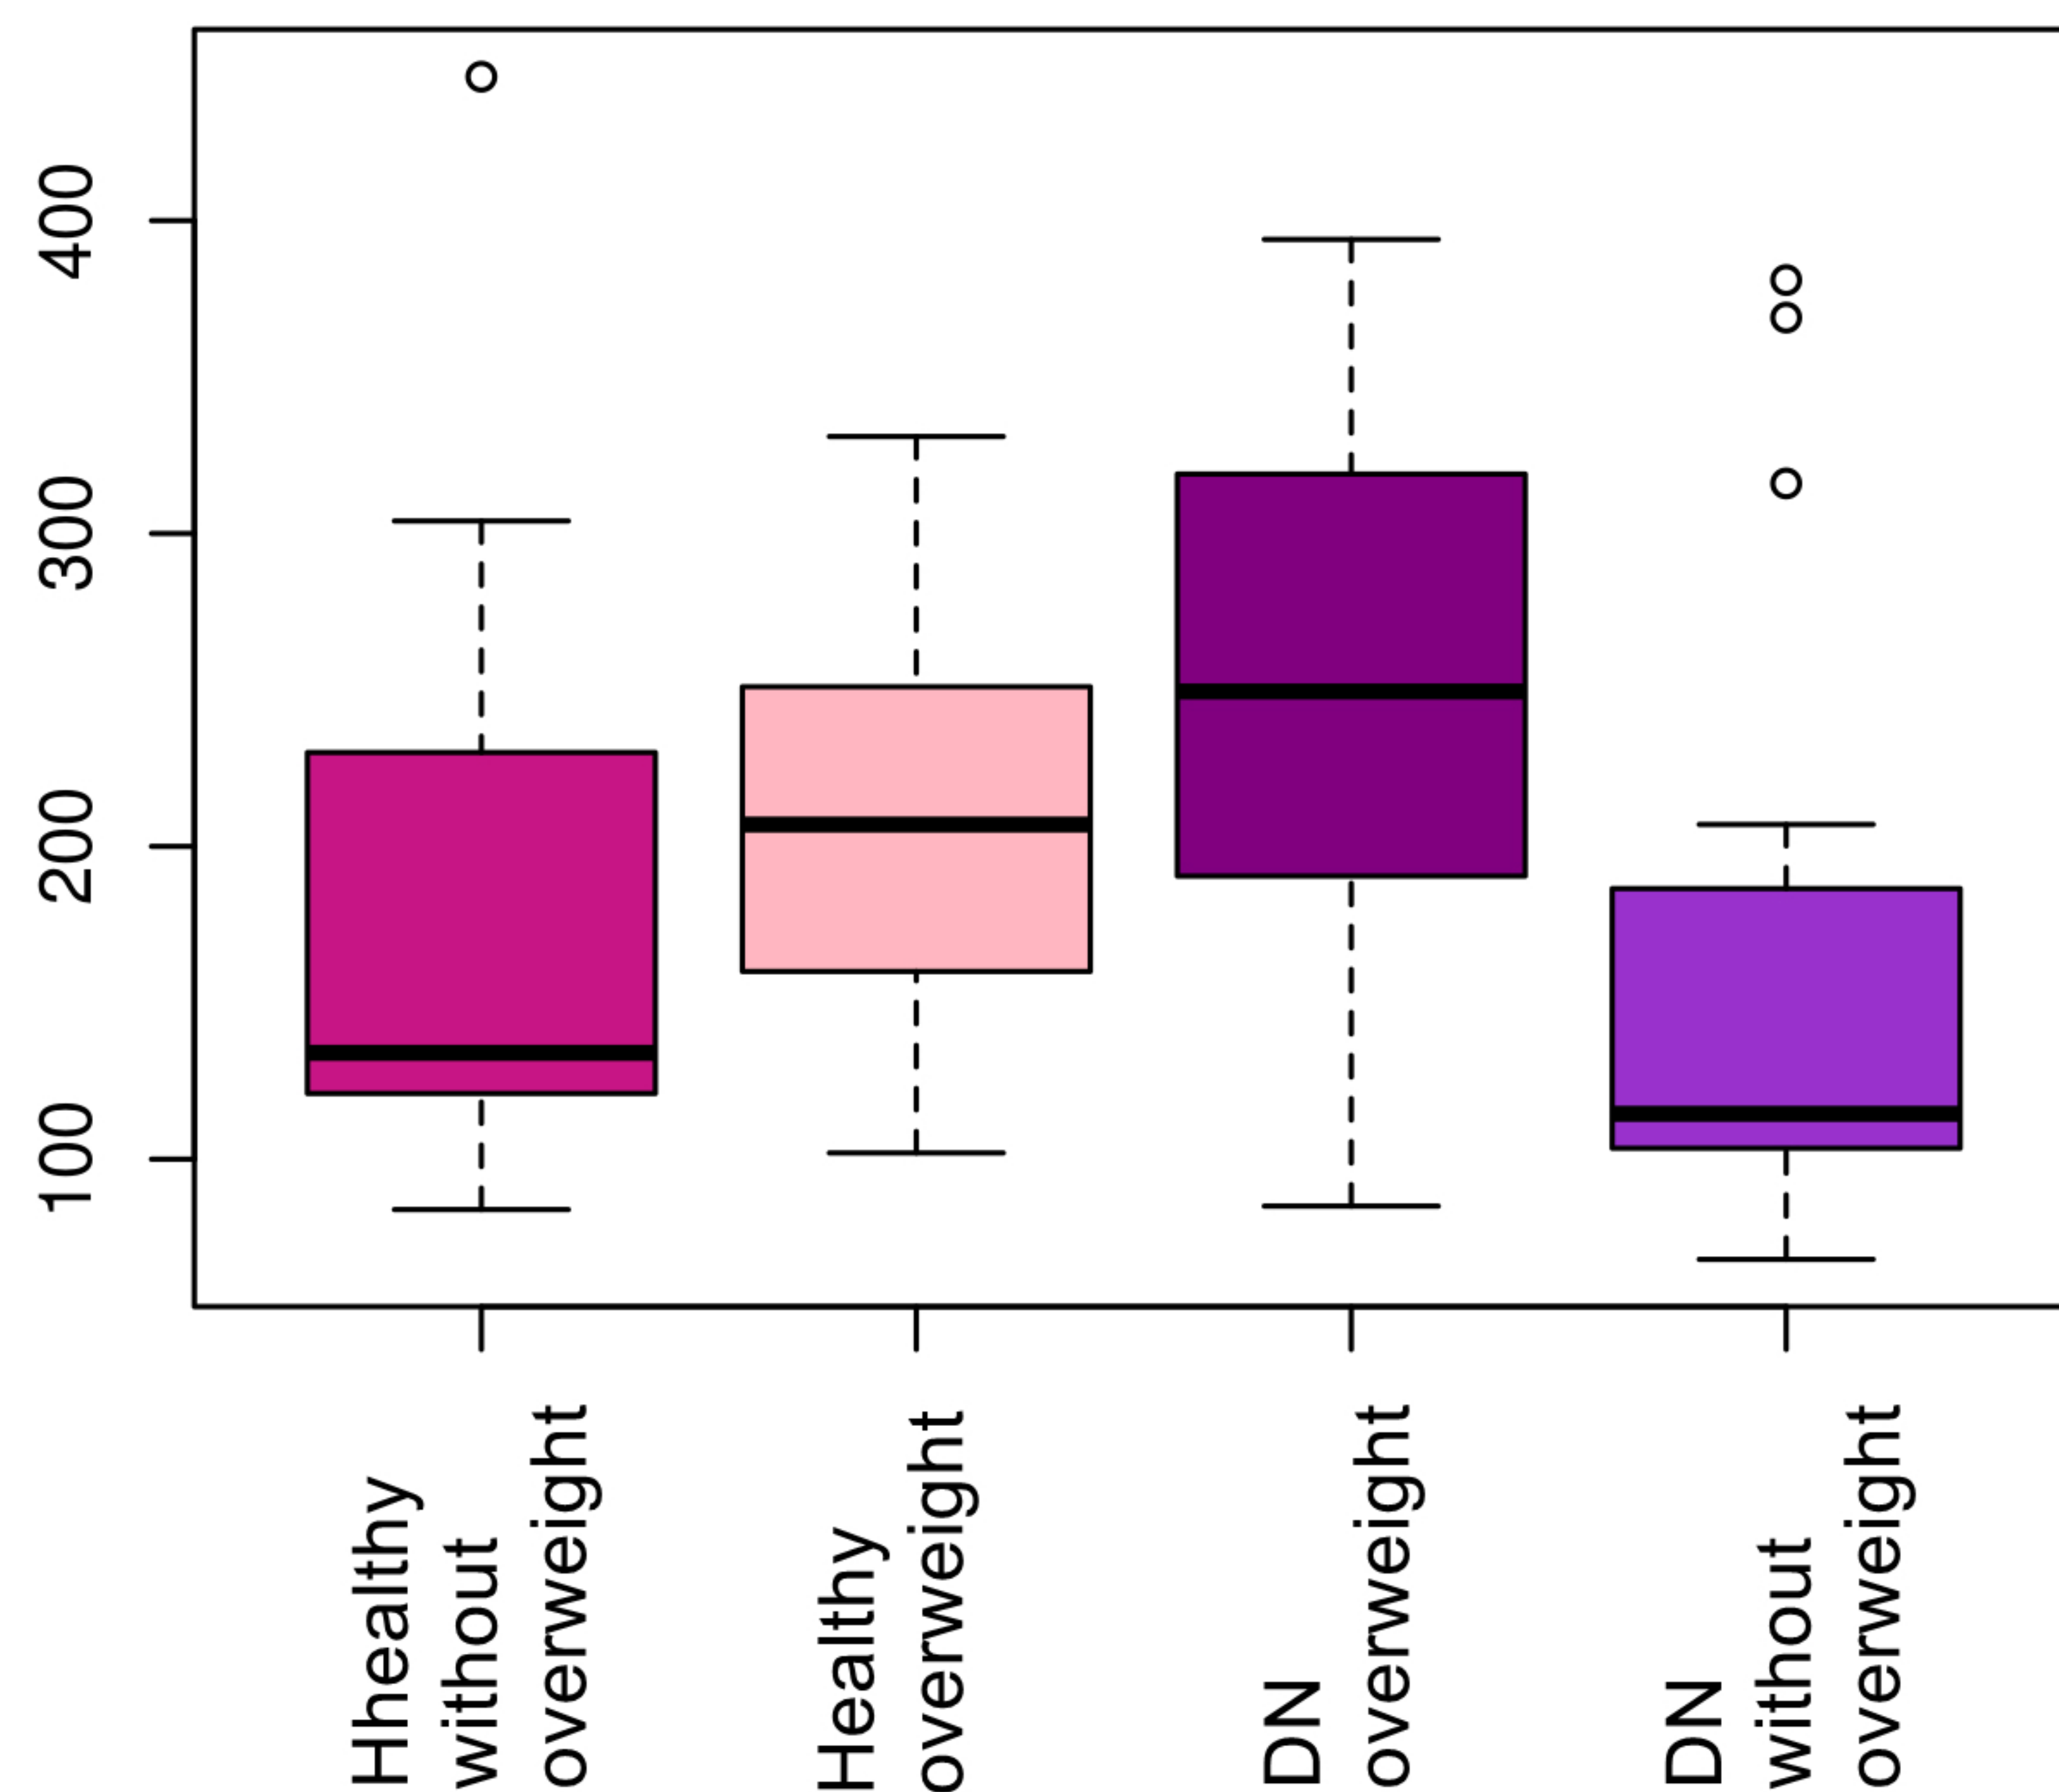

PD\_whole\_tree

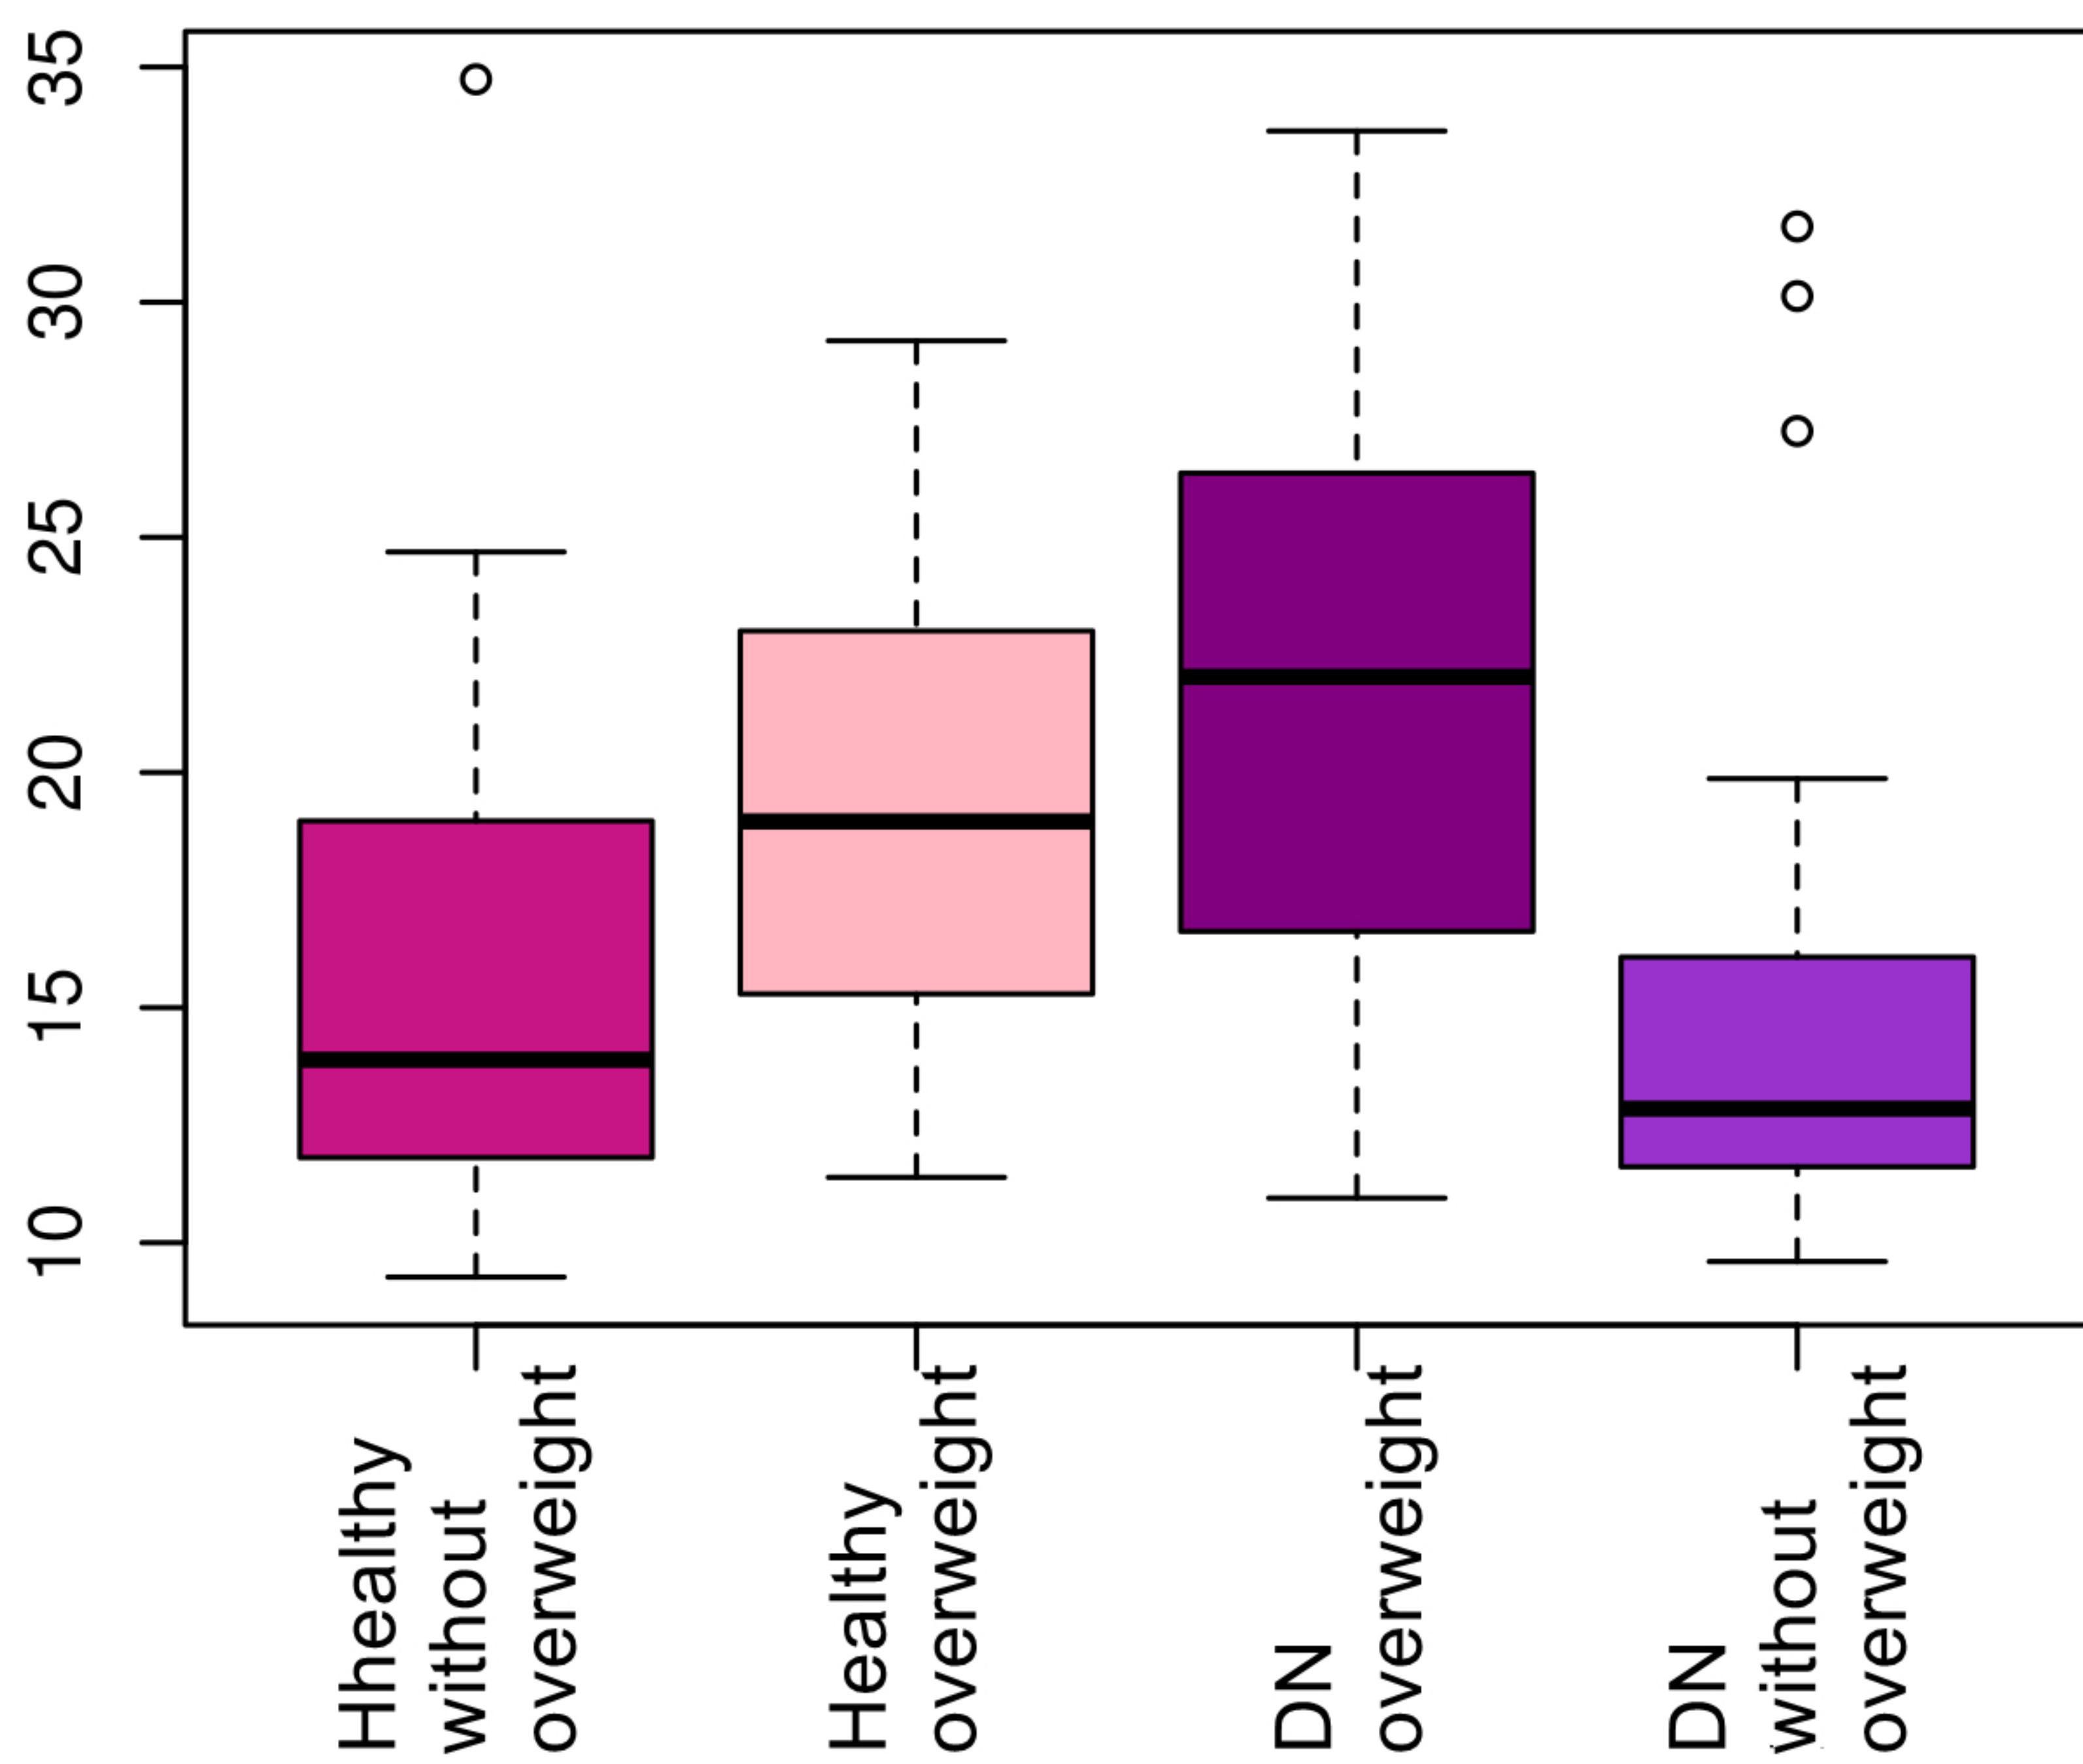

shannon

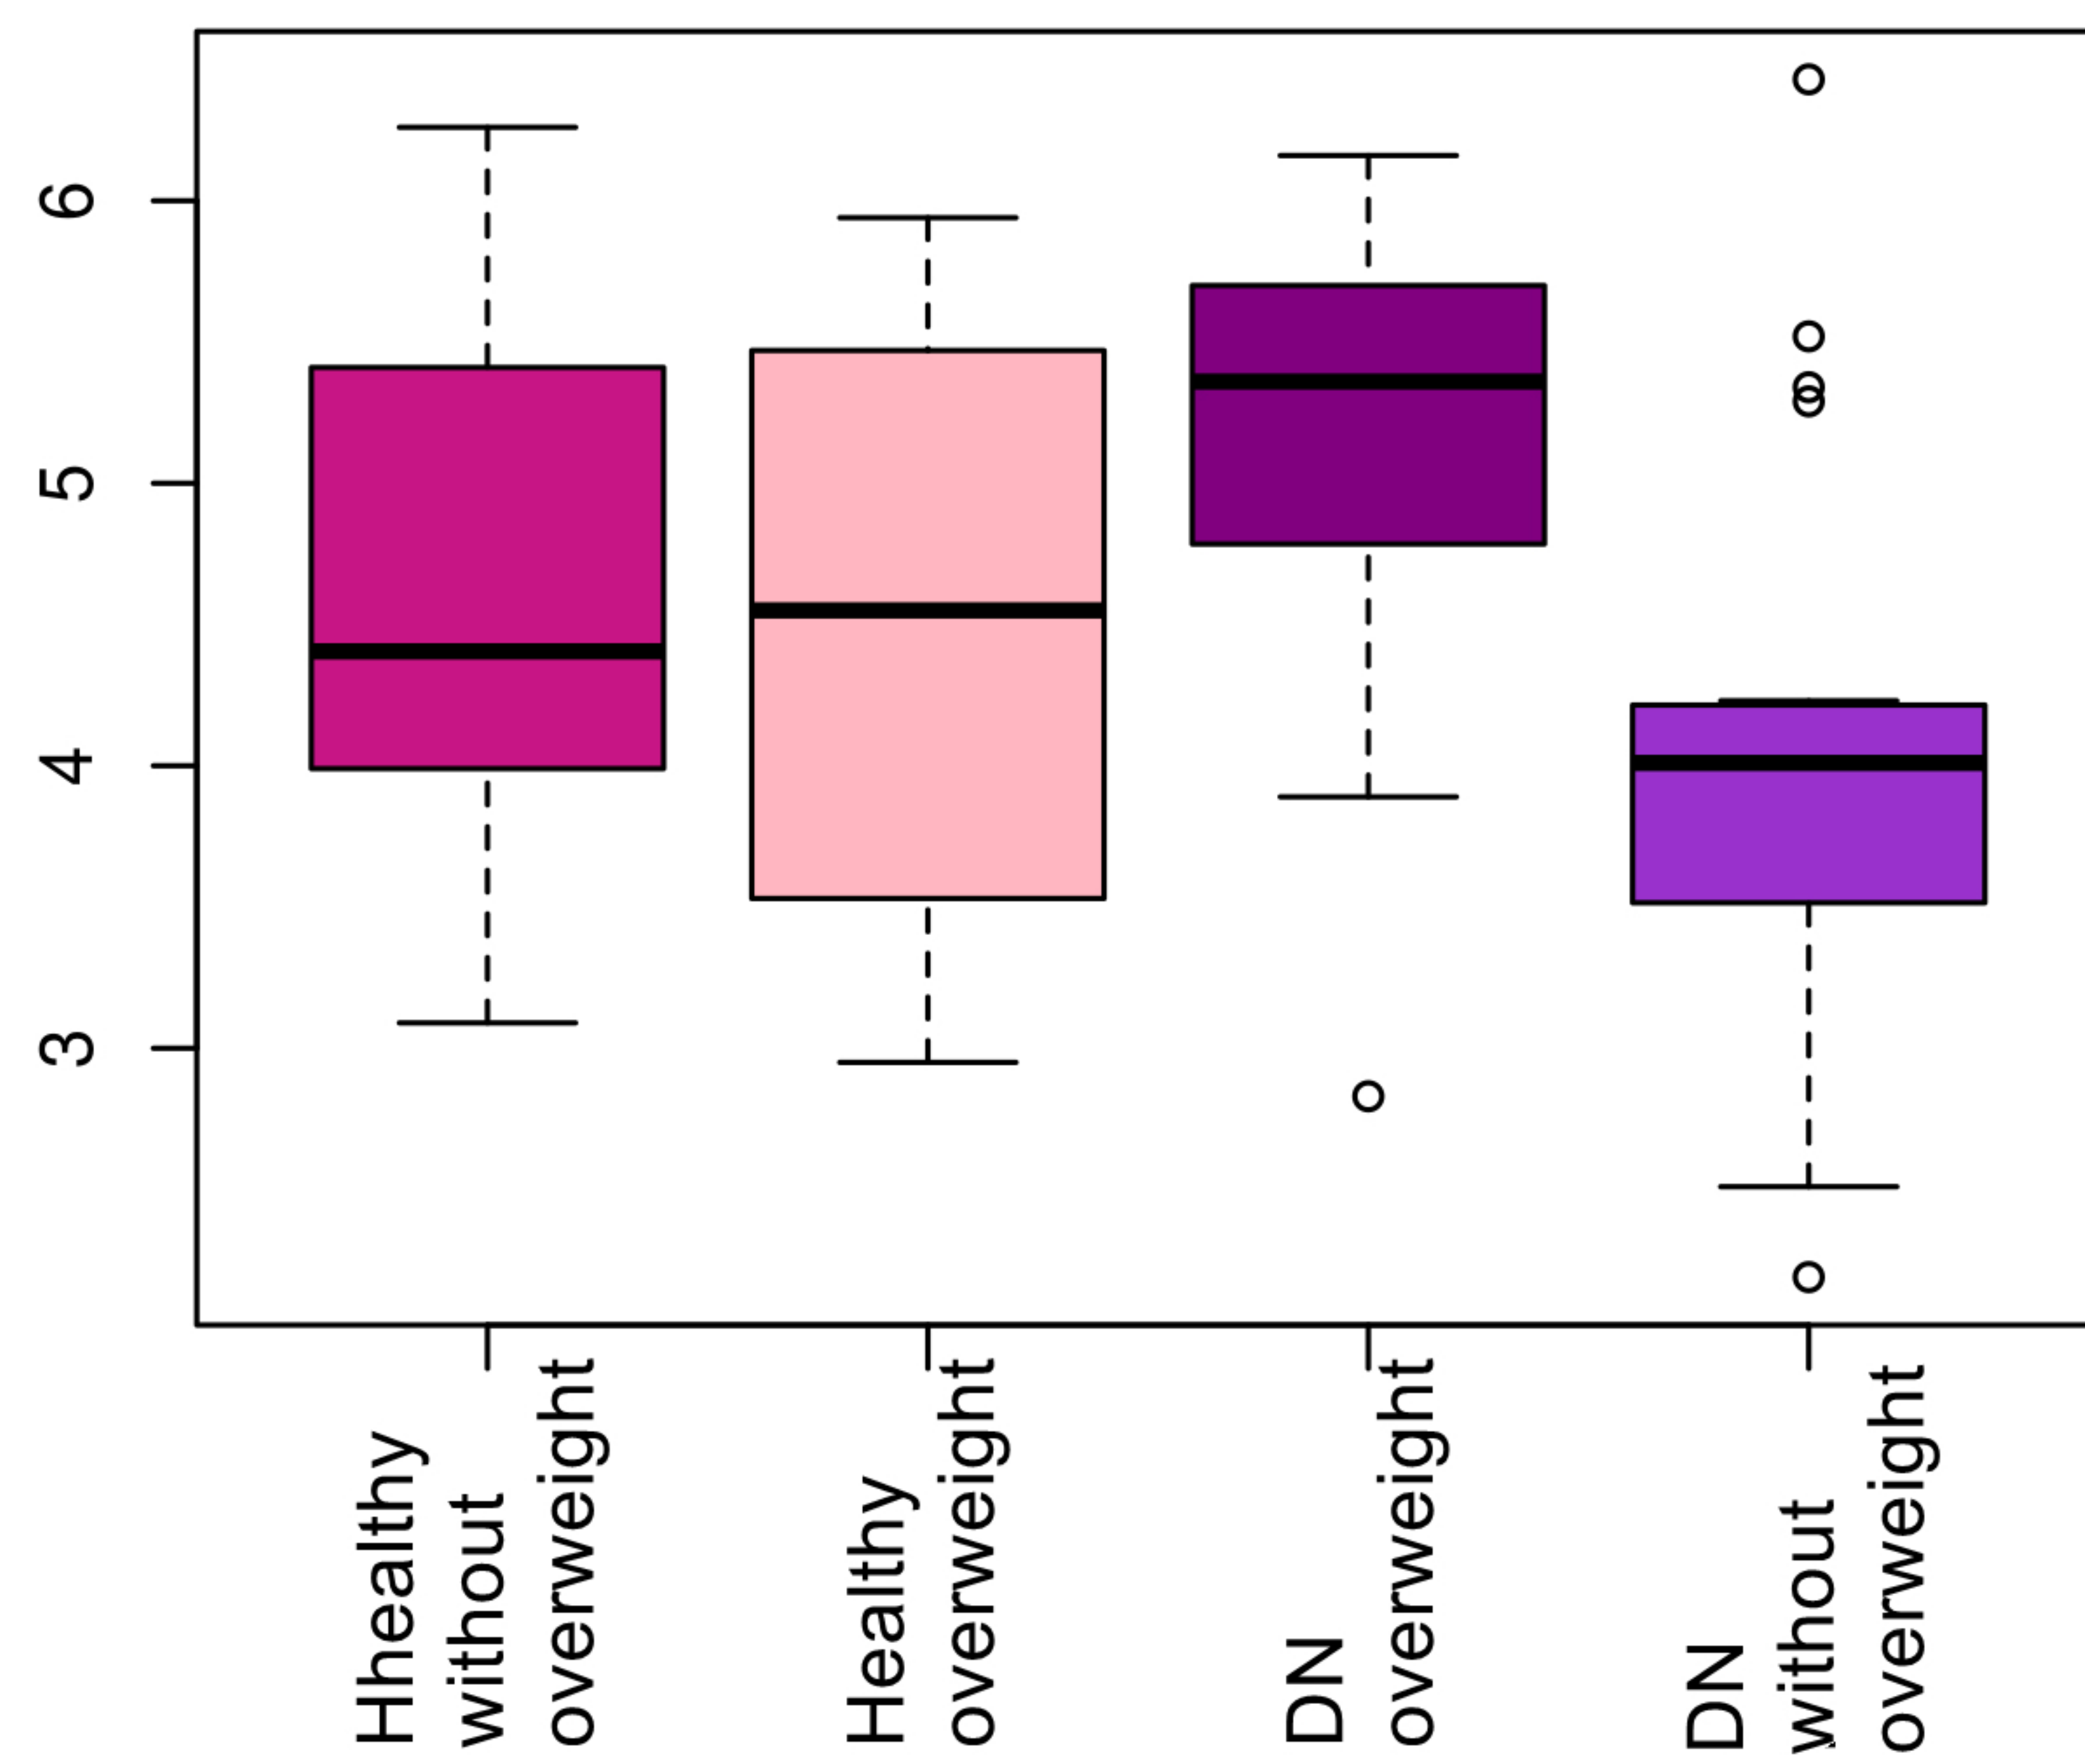

Supplement: Supplementary file 4 [file 09_Aug_2021_supplementary_figure_4.pdf › 09_Aug_2021_supplementary_figure_4.pdf]
